# Supplementary material for: Pure flavonoid epicatechin and whole genome gene expression profiles in circulating immune cells in adults with elevated blood pressure: A randomised double-blind, placebo-controlled, crossover trial
Source: PLOS journal article supplement (doi:10.1371/journal.pone.0194229), 2018-04-19
Supplement: S3 (10.1371/journal.pone.0194229.s003) [file journal.pone.0194229.s003]

**Table A.** Predicted upstream regulators upon epicatechin supplementation ( $\Delta$  epicatechin).

| Upstream Regulator | Molecule Type            | Predicted Activation State | Activation z-score | P-value of Overlap |
|--------------------|--------------------------|----------------------------|--------------------|--------------------|
| NFkB (complex)     | complex                  | Inhibited                  | -5.38              | <0.01              |
| PDGF BB            | complex                  | Inhibited                  | -5.18              | <0.01              |
| TNF                | cytokine                 | Inhibited                  | -5.03              | <0.01              |
| EGF                | growth factor            | Inhibited                  | -4.59              | 0.01               |
| IL1B               | cytokine                 | Inhibited                  | -4.35              | <0.01              |
| NUPR1              | transcription regulator  | Inhibited                  | -4.35              | <0.01              |
| EGFR               | Kinase                   | Inhibited                  | -4.25              | <0.01              |
| TGFB1              | growth factor            | Inhibited                  | -4.17              | <0.01              |
| F2                 | peptidase                | Inhibited                  | -4.14              | 0.01               |
| Cg                 | complex                  | Inhibited                  | -3.98              | <0.01              |
| TLR4               | transmembrane receptor   | Inhibited                  | -3.96              | <0.01              |
| STAT3              | transcription regulator  | Inhibited                  | -3.81              | <0.01              |
| IL6                | cytokine                 | Inhibited                  | -3.67              | 0.01               |
| IL17A              | cytokine                 | Inhibited                  | -3.52              | <0.01              |
| IGF1               | growth factor            | Inhibited                  | -3.47              | 0.04               |
| ERBB2              | Kinase                   | Inhibited                  | -3.47              | <0.01              |
| CSF3               | cytokine                 | Inhibited                  | -3.43              | <0.01              |
| RELA               | transcription regulator  | Inhibited                  | -3.34              | <0.01              |
| IFNG               | Cytokine                 | Inhibited                  | -3.33              | <0.01              |
| MAP2K1             | Kinase                   | Inhibited                  | -3.27              | 0.02               |
| CSF2               | cytokine                 | Inhibited                  | -3.19              | <0.01              |
| MYD88              | Other                    | Inhibited                  | -3.19              | <0.01              |
| SP1                | transcription regulator  | Inhibited                  | -3.19              | <0.01              |
| IL5                | cytokine                 | Inhibited                  | -3.18              | <0.01              |
| IL1A               | cytokine                 | Inhibited                  | -3.18              | 0.04               |
| CREM               | transcription regulator  | Inhibited                  | -3.15              | 0.03               |
| HMGB1              | transcription regulator  | Inhibited                  | -3.08              | <0.01              |
| ADIPOQ             | Other                    | Inhibited                  | -3.05              | 0.02               |
| SYVN1              | transporter              | Inhibited                  | -3.05              | 0.02               |
| NRG1               | Other                    | Inhibited                  | -2.98              | <0.01              |
| TLR7               | transmembrane receptor   | Inhibited                  | -2.95              | 0.04               |
|                    | ligand-dependent nuclear |                            |                    |                    |
| PGR                | receptor                 | Inhibited                  | -2.84              | 0.04               |
| CSF1               | cytokine                 | Inhibited                  | -2.82              | <0.01              |
| EDN1               | cytokine                 | Inhibited                  | -2.81              | 0.01               |
| FOXO1              | transcription regulator  | Inhibited                  | -2.81              | <0.01              |
| FOXL2              | transcription regulator  | Inhibited                  | -2.81              | <0.01              |
| Creb               | Group                    | Inhibited                  | -2.78              | 0.01               |
| EIF2AK2            | Kinase                   | Inhibited                  | -2.76              | 0.01               |
| CAMP               | Other                    | Inhibited                  | -2.75              | <0.01              |
| TICAM1             | Other                    | Inhibited                  | -2.75              | <0.01              |
| IKBKB              | Kinase                   | Inhibited                  | -2.66              | <0.01              |

|                     |                         |           |       |       |
|---------------------|-------------------------|-----------|-------|-------|
| EGR1                | transcription regulator | Inhibited | -2.65 | 0.01  |
| TGM2                | enzyme                  | Inhibited | -2.64 | <0.01 |
| TREM1               | transmembrane receptor  | Inhibited | -2.61 | <0.01 |
| IKBKG               | Kinase                  | Inhibited | -2.61 | <0.01 |
| NOD2                | Other                   | Inhibited | -2.60 | 0.02  |
| TNFSF13B            | cytokine                | Inhibited | -2.59 | 0.01  |
| Fibrinogen          | complex                 | Inhibited | -2.57 | <0.01 |
| PI3K (complex)      | complex                 | Inhibited | -2.50 | <0.01 |
| LDL                 | complex                 | Inhibited | -2.48 | <0.01 |
| TNFSF11             | cytokine                | Inhibited | -2.46 | <0.01 |
| ECSIT               | transcription regulator | Inhibited | -2.45 | <0.01 |
| AGT                 | growth factor           | Inhibited | -2.45 | 0.04  |
| CHUK                | kinase                  | Inhibited | -2.44 | <0.01 |
| IFNGR1              | transmembrane receptor  | Inhibited | -2.43 | 0.01  |
| TRADD               | other                   | Inhibited | -2.43 | <0.01 |
| IL32                | cytokine                | Inhibited | -2.42 | 0.03  |
| ID3                 | transcription regulator | Inhibited | -2.40 | <0.01 |
| TLR5                | transmembrane receptor  | Inhibited | -2.39 | 0.01  |
| PLAUR               | transmembrane receptor  | Inhibited | -2.38 | 0.01  |
| CCL2                | cytokine                | Inhibited | -2.37 | <0.01 |
| C5                  | cytokine                | Inhibited | -2.35 | <0.01 |
| JUN                 | transcription regulator | Inhibited | -2.34 | 0.01  |
| TGFA                | growth factor           | Inhibited | -2.34 | 0.01  |
| CD5                 | transmembrane receptor  | Inhibited | -2.33 | <0.01 |
| P38 MAPK            | group                   | Inhibited | -2.32 | 0.02  |
| IRF8                | transcription regulator | Inhibited | -2.29 | <0.01 |
| FOS                 | transcription regulator | Inhibited | -2.24 | <0.01 |
| BTC                 | growth factor           | Inhibited | -2.24 | <0.01 |
| CFB                 | peptidase               | Inhibited | -2.22 | <0.01 |
| IL13                | cytokine                | Inhibited | -2.22 | 0.01  |
| NCR2                | transmembrane receptor  | Inhibited | -2.21 | <0.01 |
| CCL5                | cytokine                | Inhibited | -2.21 | <0.01 |
| Growth hormone      | group                   | Inhibited | -2.21 | <0.01 |
| Pro-inflam.Cytokine | group                   | Inhibited | -2.20 | 0.03  |
| JUND                | transcription regulator | Inhibited | -2.19 | <0.01 |
| ITGA5               | transmembrane receptor  | Inhibited | -2.18 | 0.02  |
| S100A4              | other                   | Inhibited | -2.17 | 0.01  |
| EIF4E               | translation regulator   | Inhibited | -2.14 | 0.01  |
| RETN                | other                   | Inhibited | -2.10 | <0.01 |
| Vegf                | group                   | Inhibited | -2.09 | 0.01  |
| ERK1/2              | group                   | Inhibited | -2.09 | <0.01 |
| MAPK14              | kinase                  | Inhibited | -2.05 | <0.01 |
| CEBPD               | transcription regulator | Inhibited | -2.04 | 0.04  |
| LGALS3              | other                   | Activated | 2.01  | 0.03  |
| FLT1                | kinase                  | Activated | 2.12  | 0.03  |
| miR-155-5p          | mature microRNA         | Activated | 2.17  | <0.01 |

|               |                                      |           |      |       |
|---------------|--------------------------------------|-----------|------|-------|
| miR-27a-3p    | mature microRNA                      | Activated | 2.22 | 0.04  |
| SOX7          | transcription regulator              | Activated | 2.24 | 0.02  |
| IL1RN         | cytokine                             | Activated | 2.38 | 0.02  |
| miR-34a-5p    | mature microRNA                      | Activated | 2.43 | 0.04  |
| miR-124-3p    | mature microRNA                      | Activated | 2.54 | 0.02  |
| Alpha catenin | group                                | Activated | 2.55 | <0.01 |
| GFI1          | transcription regulator              | Activated | 2.65 | 0.02  |
| GPX1          | enzyme                               | Activated | 2.80 | <0.01 |
| DUSP1         | phosphatase                          | Activated | 2.88 | <0.01 |
| ESR1          | ligand-dependent nuclear<br>receptor | Activated | 3.92 | <0.01 |

---

Upstream regulators were considered predicted if two-sided *P* value <0.05 and activation z-score > 2 or < -2. Upstream regulators classified as chemicals/drugs were excluded.

**Table B.** Predicted upstream regulators upon placebo supplementation ( $\Delta$  placebo).

| Upstream Regulator | Molecule Type | Predicted<br>Activation<br>State | Activation<br>z-score | p-value<br>of<br>overlap |
|--------------------|---------------|----------------------------------|-----------------------|--------------------------|
| ERBB3              | kinase        | Inhibited                        | -2.22                 | 0.03                     |
| CD24               | other         | Activated                        | 2.00                  | 0.02                     |

Upstream regulators were considered predicted if two-sided *P* value <0.05 and activation z-score > 2 or < -2. Upstream regulators classified as chemicals/drugs were excluded.

**Table C.** Genes of which expression changes showed significant correlation with changes in FMD after the epicatechin or placebo intervention

| Gene                | Epicatechin |                 | Placebo  |                 |
|---------------------|-------------|-----------------|----------|-----------------|
|                     | <i>r</i>    | <i>P</i> -value | <i>r</i> | <i>P</i> -value |
| <i>RRAGA</i>        | 0.52        | 0.01            | -0.08    | NS              |
| <i>VPS29</i>        | 0.48        | 0.02            | 0.24     | NS              |
| <i>RPL9</i>         | -0.46       | 0.02            | -0.07    | NS              |
| <i>FBXO39</i>       | -0.45       | 0.03            | -0.20    | NS              |
| <i>LOC100128288</i> | -0.45       | 0.03            | -0.30    | NS              |
| <i>ARID1B</i>       | -0.44       | 0.03            | -0.10    | NS              |
| <i>SLC25A35</i>     | -0.43       | 0.04            | 0.25     | NS              |
| <i>SUMO1</i>        | 0.43        | 0.04            | 0.32     | NS              |
| <i>ST8SIA1</i>      | 0.42        | 0.04            | -0.31    | NS              |
| <i>USP51</i>        | 0.42        | 0.04            | 0.16     | NS              |
| <i>HRK</i>          | 0.23        | NS              | 0.56     | 0.00            |
| <i>ARHGAP10</i>     | -0.07       | NS              | -0.47    | 0.01            |
| <i>FKBP9</i>        | -0.08       | NS              | 0.45     | 0.02            |
| <i>FAM149B1</i>     | -0.22       | NS              | 0.45     | 0.02            |
| <i>EEPD1</i>        | 0.13        | NS              | 0.44     | 0.02            |
| <i>GFI1</i>         | -0.23       | NS              | -0.42    | 0.03            |
| <i>CCDC149</i>      | -0.09       | NS              | 0.42     | 0.03            |
| <i>MAGOH</i>        | -0.17       | NS              | 0.41     | 0.03            |
| <i>NFIA</i>         | -0.04       | NS              | 0.41     | 0.03            |
| <i>SLITRK4</i>      | -0.01       | NS              | 0.39     | 0.04            |
| <i>C2orf48</i>      | -0.04       | NS              | 0.39     | 0.04            |
| <i>CD180</i>        | 0.08        | NS              | 0.38     | 0.04            |
| <i>NAMPT</i>        | 0.00        | NS              | 0.38     | 0.04            |
| <i>BIK</i>          | 0.24        | NS              | 0.38     | 0.05            |
| <i>OR10G4</i>       | -0.06       | NS              | -0.38    | 0.05            |

Pearson Correlation was performed on signal-to-log ratios (SLR). Correlations were performed on 234 genes significantly regulated by epicatechin supplementation compared to the placebo. Depicted correlations were significant in the epicatechin (*n*=24) or placebo (*n*=28) intervention. NS: not significant.

**Table D.** Genes of which expression changes showed significant correlation with changes in insulin after the epicatechin or placebo intervention

| Gene             | Epicatechin |                 | Placebo  |                 |
|------------------|-------------|-----------------|----------|-----------------|
|                  | <i>r</i>    | <i>P</i> -value | <i>r</i> | <i>P</i> -value |
| <i>JMJD6</i>     | 0.44        | 0.01            | 0.11     | NS              |
| <i>PLXNA1</i>    | -0.42       | 0.02            | 0.00     | NS              |
| <i>MT1M</i>      | 0.39        | 0.03            | -0.19    | NS              |
| <i>LINC00910</i> | -0.39       | 0.03            | -0.09    | NS              |
| <i>MUT</i>       | 0.39        | 0.03            | 0.15     | NS              |
| <i>LRCH4</i>     | -0.38       | 0.03            | -0.28    | NS              |
| <i>ARMC5</i>     | -0.38       | 0.03            | -0.07    | NS              |
| <i>EGLN3</i>     | 0.38        | 0.03            | -0.14    | NS              |
| <i>CNFN</i>      | -0.38       | 0.03            | -0.27    | NS              |
| <i>DCK</i>       | 0.38        | 0.03            | 0.25     | NS              |
| <i>MYPOP</i>     | -0.37       | 0.04            | 0.22     | NS              |
| <i>CES4A</i>     | 0.37        | 0.04            | 0.07     | NS              |
| <i>FOXQ1</i>     | -0.37       | 0.04            | -0.09    | NS              |
| <i>OR10G4</i>    | -0.37       | 0.04            | -0.25    | NS              |
| <i>AGXT</i>      | -0.36       | 0.04            | 0.02     | NS              |
| <i>PLXND1</i>    | -0.36       | 0.04            | -0.05    | NS              |
| <i>KRBA1</i>     | 0.36        | 0.04            | -0.16    | NS              |
| <i>MIER3</i>     | 0.14        | NS              | 0.46     | 0.01            |
| <i>MAN2C1</i>    | -0.27       | NS              | -0.46    | 0.01            |
| <i>RAE1</i>      | 0.13        | NS              | 0.42     | 0.02            |
| <i>PQLC2</i>     | 0.03        | NS              | -0.41    | 0.02            |
| <i>SHISA7</i>    | -0.11       | NS              | -0.41    | 0.02            |
| <i>BNIP1</i>     | -0.10       | NS              | 0.37     | 0.04            |

Pearson Correlation was performed on signal-to-log ratios (SLR). Correlations were performed on 234 genes significantly regulated by epicatechin supplementation compared to the placebo. Depicted correlations were significant in the epicatechin or placebo ( $n=32$ ) intervention. NS: not significant.
